# Supplementary material
Source: publisher site journal article supplement (https://www.dovepress.com/article/426844)
Supplement: Supplementary file 1 [file get_supplementary_file.php]

Supplementary Material 1: Knowledge of disease and medical treatment questionnaire

1. It is important to keep my bowels working 2–3 times to remove toxins from the body. (True/ False)

2. All alcohol will affect my liver function. (True/ False)

3. Eating unpasteurised dairy products poses a food poisoning risk to me. (True/ False)

4. Cirrhosis can cause my calcium level to be low. (True/ False)

5. The most important protein supplement meal is to be eaten before I go to bed. (True/ False)

6. It is ok to adjust my medications if my symptoms have improved. (True/ False)

7. I should have an ultrasound to check for liver cancer every year. (True/ False)

8. I should come to the emergency department if I vomit blood or pass blood in the toilet. (True/ False)

9. The liver cleansing diet will improve my health. (True/ False)

10. Herbal medications will help my liver. (True/ False)

Supplementary Material 2: Oslo social support scale

1. How many people are so close to you that you can count on them if you have great personal problems? (1-4)

2. How much interest and concern do people show in what you do? (1-5)

3. How easy is it to get practical help from neighbors if you should need it? (1-5)

Supplementary Material 3: Exercise of Self-Care Agency scale (0-4 points)

1. if it can improve my health, I am willing to give up some fixed habits

2. I like myself

3. I often feel unable to take care of my health in the way I want

4. when my health deteriorates, I will find some common sense I need to improve my health

5. I am proud of what I have done to maintain my health

6. I often neglect my own needs

7. I know my strengths and weaknesses

8. when I can't take care of myself, I will ask for help

9. I will make some new plans (such as those related to health)

10. I often give up things that are good for my health

11. I will use some family secret recipes that used to be effective without asking medical staff for help

12. I can make my own decisions (e.g. health related)

13. I will do some activities to avoid getting sick

14. I try to make myself better (e.g. health)

15. I eat a balanced diet

16. I will complain about things that cause trouble to me, but I seldom take actions to improve it

17. I will find a way to take care of my health

18. I expect to achieve the best health

19. when I have a problem, I need an expert to tell me how to do it

20. to maintain my health, the time spent taking care of myself is valuable

21. I will implement my own decisions (such as those related to health)

22. I am not interested in knowing my physical function

23. if I don't treat myself well, I can't treat others well

24. I know my physical function

25. I rarely practice health-related activities

26. I am my good friend

27. I can take good care of myself

28. I occasionally think of promoting my health

29. I will arrange my rest and exercise time

30. I am interested in understanding the process of various diseases and their impact on me

31. I think life is a happy thing

32. I don't think I have contributed much to the operation of my family

33. I will be responsible for my actions

34. I have little contribution to others

35. a few days before I became ill, I would know in advance where I might have a problem

36. after years of experience, I have known what can make me more comfortable

37. I know what to eat to maintain my health

38. I am interested in understanding my own body and its functions

39. sometimes when I feel ill, I will ignore this feeling and hope it will disappear

40. I will find some relevant knowledge to take care of myself

41. I feel that I am an important member of my family

42. I remember the time of my last health check-up. I will have another check-up next time

43. I understand myself and my needs
